# Supplementary material for: EGFR-TKI resistance promotes immune escape in lung cancer via increased PD-L1 expression
Source: PubMed Central journal article supplement (PMC6864970; doi:10.1186/s12943-019-1073-4), 2019-11-20
Supplement: 12943_2019_1073_MOESM2_ESM.pdf [file 12943_2019_1073_MOESM2_ESM.pdf]

# EGFR-TKI Resistance Promotes Immune Escape in Lung Cancer via Increased PD-L1 Expression

Shunli Peng<sup>1</sup>, Rong Wang<sup>1</sup>, Xiaojuan Zhang<sup>1</sup>, Yueyun Ma<sup>1</sup>, Longhui Zhong<sup>1</sup>, Ke Li<sup>2</sup>, Nishiyama Akihiro<sup>3</sup>, Sachiko Arai<sup>3</sup>, Seiji Yano<sup>3</sup>, Wei Wang<sup>1</sup>

## Supplementary Table S1

Supplementary Table S1. Basic information of EGFR-TKIs resistant NSCLC patients

Supplemental Table. S1

Basic information of EGFR-TKIs resistant NSCLC patients

| Basic information    |               |                  |                 | Tumor type and TNM stage |                    |                                                             |      |     |    |     | Mutant and Resistant information |                        |                      |
|----------------------|---------------|------------------|-----------------|--------------------------|--------------------|-------------------------------------------------------------|------|-----|----|-----|----------------------------------|------------------------|----------------------|
| Sample ID (biopsies) | Female / Male | Age at diagnosis | Smoking History | Cancer Type              | Biopsy Sample Type | American Joint Committee on Cancer Publication Version Type |      |     |    |     | Mutation Type                    | EGFR-TKIs therapy type | Resistant Mechanisms |
| ①H07-01366           | Male          | 65               | NO              | Adenocarcinoma           | Primary Tumor      | 6th                                                         | IIIA | T2  | N2 | M0  | EGFR mutant                      | Gefitinib              | Unknown              |
| ②H09-08273           | Female        | 71               | NO              | Adenocarcinoma           | Primary Tumor      | 7th                                                         | IIIA | T2  | N2 | M0  | EGFR mutant                      | Gefitinib              | Unknown              |
| ③H12-03382           | Female        | 60               | NO              | Adenocarcinoma           | Primary Tumor      | 7th                                                         | IIIA | T3  | N1 | M0  | EGFR mutant                      | Gefitinib              | Unknown              |
| ④H10-02317           | Female        | 52               | NO              | Adenocarcinoma           | Primary Tumor      | 7th                                                         | IIA  | T2  | N1 | M0  | EGFR mutant                      | Erlotinib              | Unknown              |
| ⑤H03-06169           | Female        | 57               | NO              | Adenocarcinoma           | Primary Tumor      | 6th                                                         | IB   | T2  | N0 | M0  | EGFR mutant                      | Gefitinib              | Unknown              |
| ⑥H09-05014           | Male          | 69               | NO              | Adenocarcinoma           | Primary Tumor      | 7th                                                         | IIIA | T2  | N2 | M0  | EGFR mutant                      | Erlotinib              | Unknown              |
| ⑦H08-03231           | Female        | 78               | NO              | Adenocarcinoma           | Primary Tumor      | 7th                                                         | IIIA | T2  | N2 | M0  | EGFR mutant                      | Erlotinib              | Unknown              |
| ⑧H08-03316           | Male          | 64               | NO              | Adenocarcinoma           | Primary Tumor      | 7th                                                         | IV   | T2a | N2 | M1a | EGFR mutant                      | Erlotinib              | T790M                |
| ⑨H09-06235           | Female        | 69               | NO              | Adenocarcinoma           | Primary Tumor      | 7th                                                         | IA   | T1a | N0 | M0  | EGFR mutant                      | Erlotinib              | T790M                |
| ⑩H12-01756           | Female        | 67               | NO              | Adenocarcinoma           | Primary Tumor      | 7th                                                         | IIIA | T1b | N2 | M0  | EGFR mutant                      | Erlotinib              | Unknown              |
| ⑪H12-08282           | Female        | 52               | YES             | Adenocarcinoma           | Primary Tumor      | 7th                                                         | IV   | T1a | N2 | M1b | EGFR mutant                      | Gefitinib              | Unknown              |
| ⑫H16-07183           | Male          | 85               | YES             | Adenocarcinoma           | Primary Tumor      | 7th                                                         | IV   | T1b | N2 | M1b | EGFR mutant                      | Gefitinib              | Unknown              |
| ⑬H15-03460           | Male          | 74               | NO              | Adenocarcinoma           | Primary Tumor      | 7th                                                         | IV   | T2  | N2 | M1b | EGFR mutant                      | Gefitinib              | Unknown              |
| ⑭H12-08117           | Female        | 62               | NO              | Adenocarcinoma           | Primary Tumor      | 7th                                                         | IB   | T2a | N0 | M0  | EGFR mutant                      | Gefitinib              | Unknown              |
| ⑮H16-04430           | Female        | 71               | NO              | Adenocarcinoma           | Lymph-node         | 7th                                                         | IV   | T3  | N3 | M1b | EGFR mutant                      | Gefitinib              | T790M                |
